# Supplementary material for: Growth, Productivity, Biomass and Carbon Stock in Eucalyptus saligna and Grevillea robusta Plantations in North Kivu, Democratic Republic of the Congo
Source: MDPI journal article supplement (doi:10.3390/f13091508), 2022-09-16
Supplement: s1 [file s1]

# Supplementary Materials

**Table S1.** Presentation of the plantations studied. ID: plantation identifier; Es: *Eucalyptus saligna*; Gr: *Grevillea robusta*; Alt.: altitude; Topo: topographical situation; Temp.: temperature; Af: equatorial climate; Am: tropical monsoon climate.

| ID    | Site / station   | Planting date | Area (ha) | Spacing at planting (m) | Success rate (SR, %) | Geographical coordinates (°) |          | Alt. (m) | Topo (code)* | Slope (°) | Climate [41] |                  |      | Observations on maintenance and silvicultural operations between 2018 and 2020 |
|-------|------------------|---------------|-----------|-------------------------|----------------------|------------------------------|----------|----------|--------------|-----------|--------------|------------------|------|--------------------------------------------------------------------------------|
|       |                  |               |           |                         |                      | Longitude                    | Latitude |          |              |           | Temp. (°C)   | Rainfall (mm/an) | Type |                                                                                |
| Es_01 | Sake /Kimoka     | November 2011 | 0.88      | 3×3                     | 70.2                 | 29.05523                     | -1.54132 | 1571     | 0            | 0         | 19.9         | 2716             | Am   | Weed control, cutting of some stems by robbers                                 |
| Es_02 | Sake /Kimoka     | October 2011  | 0.66      | 3×3                     | 46.8                 | 29.05120                     | -1.54108 | 1608     | 5            | 34        | 19.9         | 2716             | Am   | Weed control, voluntary cutting of some stems in September 2020                |
| Es_03 | Sake /Kimoka     | October 2014  | 0.58      | 3×3                     | 64.8                 | 29.05807                     | -1.55118 | 1592     | 5            | 15        | 19.9         | 2716             | Am   | No silvicultural treatment, clear cutting in May 2020                          |
| Es_04 | Sake /Kimoka     | March 2014    | 1.17      | 3×3                     | 54.0                 | 29.05341                     | -1.55151 | 1611     | 5            | 20        | 19.9         | 2716             | Am   | No silvicultural treatment, cutting of some stems by robbers                   |
| Es_05 | Sake /Kimoka     | March 2013    | 0.49      | 3×3                     | 52.2                 | 29.05731                     | -1.54679 | 1572     | 0            | 0         | 19.9         | 2716             | Am   | Amaranth cultivation, voluntary cutting of some stems in February 2020         |
| Es_06 | Sake /Kimoka     | March 2014    | 1.19      | 3×3                     | 43.2                 | 29.05865                     | -1.55336 | 1560     | 0            | 1         | 19.9         | 2716             | Am   | Bean crop, voluntary cutting of some stems between 2019 and 2020               |
| Es_07 | Sake /Kimoka     | October 2014  | 0.77      | 3×3                     | 64.8                 | 29.05279                     | -1.55211 | 1611     | 5            | 24        | 19.9         | 2716             | Am   | No silvicultural treatment, cutting of some stems by robbers                   |
| Es_08 | Sake /Kimoka     | October 2014  | 1.83      | 3×3                     | 48.6                 | 29.05769                     | -1.55168 | 1565     | 7            | 26        | 19.9         | 2716             | Am   | No silvicultural treatment, clear cutting in June 2020                         |
| Es_09 | Sake /Mubambiro  | March 2011    | 0.89      | 2.5×2.5                 | 30.0                 | 29.06884                     | -1.57363 | 1499     | 6            | 5         | 19.9         | 2716             | Am   | Weed control, no silvicultural treatment, fire in August 2020                  |
| Es_10 | Sake /Mubambiro  | March 2015    | 0.61      | 2 × 2                   | 66.4                 | 29.06883                     | -1.57234 | 1520     | 5            | 18        | 19.9         | 2716             | Am   | No silvicultural treatment, cutting of some stems by robbers                   |
| Es_11 | Sake /Mubambiro  | November 2015 | 1.98      | 2 × 2                   | 41.6                 | 29.06949                     | -1.57216 | 1520     | 5            | 7         | 19.9         | 2716             | Am   | No silvicultural treatment, cutting of some stems by robbers                   |
| Es_12 | Sake /Kasoko     | March 2011    | 0.59      | 3×3                     | 41.4                 | 29.04918                     | -1.56200 | 1529     | 5            | 39        | 19.9         | 2716             | Am   | Weed control, voluntary cutting of some stems between March-May 2020           |
| Es_13 | Kirumba /Kaseghe | February 2010 | 0.77      | 3×3                     | 73.8                 | 29.17815                     | -0.46261 | 2154     | 4            | 17        | 18.4         | 3750             | Af   | No silvicultural treatment                                                     |
| Es_14 | Kirumba /Kaseghe | February 2010 | 0.94      | 3×3                     | 97.2                 | 29.15591                     | -0.46925 | 2000     | 8            | 6         | 18.4         | 3750             | Af   | Thinning of 60% of the stems between November-December 2019                    |
| Es_15 | Kirumba /Kaseghe | February 2013 | 0.71      | 3×3                     | 54.0                 | 29.15922                     | -0.47639 | 2052     | 5            | 24        | 18.4         | 3750             | Af   | Weed control, clear cutting between June-July 2020                             |
| Es_16 | Kirumba /Kaseghe | October 2013  | 1.80      | 3×3                     | 68.4                 | 29.17374                     | -0.48001 | 2179     | 5            | 16        | 18.4         | 3750             | Af   | Weed control, thinning between May-June 2020                                   |
| Es_17 | Kirumba /Kaseghe | October 2013  | 1.91      | 3×3                     | 52.2                 | 29.17629                     | -0.48064 | 2163     | 5            | 14        | 18.4         | 3750             | Af   | Weed control, cassava cultivation, cutting of some stems by robbers            |
| Es_18 | Kirumba /Kaseghe | March 2015    | 0.49      | 3×3                     | 90.0                 | 29.19934                     | -0.49337 | 2177     | 4            | 17        | 18.4         | 3750             | Af   | No silvicultural treatment, passing of fire in June 2019                       |
| Es_19 | Kirumba /Bulotwa | November 2016 | 0.71      | 3×3                     | 100.0                | 29.15817                     | -0.58515 | 1655     | 6            | 4         | 18.4         | 3750             | Af   | Weed control, no silvicultural treatment                                       |
| Es_20 | Kirumba /Bulotwa | November 2016 | 2.65      | 3×3                     | 61.2                 | 29.17159                     | -0.58689 | 1754     | 4            | 6         | 18.4         | 3750             | Af   | Weed control, no silvicultural treatment                                       |
| Gr_01 | Sake /Kirotshe   | October 2010  | 0.68      | 3×3                     | 34.2                 | 29.03588                     | -1.60799 | 1472     | 0            | 1         | 19.9         | 2716             | Am   | Pruning, amaranth and bean cultivation                                         |

|       |                  |               |      |     |      |          |          |      |   |    |      |      |    |                                                                    |
|-------|------------------|---------------|------|-----|------|----------|----------|------|---|----|------|------|----|--------------------------------------------------------------------|
| Gr_02 | Sake /Kirotshe   | March 2011    | 0.98 | 3×3 | 61.2 | 29.02993 | -1.60469 | 1512 | 7 | 5  | 19.9 | 2716 | Am | Bean and maize cultivation, cutting of some stalks in October 2020 |
| Gr_03 | Sake /Kimoka     | March 2011    | 1.83 | 4×4 | 51.2 | 29.05255 | -1.55311 | 1619 | 5 | 19 | 19.9 | 2716 | Am | No silvicultural treatment                                         |
| Gr_04 | Sake /Kimoka     | October 2015  | 1.67 | 3×3 | 46.8 | 29.05589 | -1.55324 | 1552 | 0 | 2  | 19.9 | 2716 | Am | No silvicultural treatment, cutting of some stems by robbers       |
| Gr_05 | Sake /Luhonga    | March 2016    | 0.65 | 3×3 | 39.6 | 29.07139 | -1.50471 | 1760 | 5 | 23 | 19.9 | 2716 | Am | No silvicultural treatment, cutting of some stems by robbers       |
| Gr_06 | Sake /Luhonga    | October 2011  | 1.08 | 3×3 | 27.0 | 29.07012 | -1.50703 | 1679 | 7 | 14 | 19.9 | 2716 | Am | No silvicultural treatment, cutting of some stems in February 2020 |
| Gr_07 | Sake /Luhonga    | October 2011  | 0.96 | 3×3 | 18.0 | 26.45419 | -1.50803 | 1670 | 7 | 10 | 19.9 | 2716 | Am | No silvicultural treatment, cutting of some stems in February 2020 |
| Gr_08 | Sake /Kirotshe   | October 2010  | 2.35 | 3×3 | 34.2 | 29.03078 | -1.60571 | 1504 | 7 | 4  | 19.9 | 2716 | Am | Maize crop, cutting of some stems between January - February 2020  |
| Gr_09 | Kirumba /Kaseghe | March 2010    | 1.68 | 3×3 | 93.6 | 29.17904 | -0.46394 | 2145 | 4 | 25 | 18.4 | 3750 | Af | Weed control, no silvicultural treatment                           |
| Gr_10 | Kirumba /Kaseghe | March 2014    | 3.00 | 4×4 | 57.6 | 29.15466 | -0.47336 | 2025 | 5 | 19 | 18.4 | 3750 | Af | Pruning, cassava and bean cultivation                              |
| Gr_11 | Kirumba /Kaseghe | March 2014    | 2.68 | 4×4 | 67.2 | 29.15544 | -0.47242 | 2042 | 5 | 18 | 18.4 | 3750 | Af | Pruning, sweet potato, maize and potato cultivation                |
| GR_12 | Kirumba /Bulotwa | November 2013 | 1.22 | 3×3 | 52.2 | 29.18741 | -0.57444 | 1734 | 7 | 11 | 18.4 | 3750 | Af | Sweet potato crop, cutting of some stems by robbers                |

\* Topo: Flat land (0), bottom of slope (7), mid-slope (5), top of slope (4), flat (6), open depression (8)

**Table S2.** Physico-chemical characteristics of soils in the plantations studied. Es: *Eucalyptus saligna*; Gr: *Grevillea robusta*.

| Site<br>(soil type)                | Plantation<br>code | Clay<br>(%) | Silt<br>(%) | Sand<br>(%) | pH-<br>H <sub>2</sub> O | CEC<br>(cmolc/kg) | Al<br>(µg/g) | Ca<br>(µg/g) | Cu<br>(µg/g) | Fe<br>(µg/g) | K<br>(µg/g) | Mg<br>(µg/g) | Mn<br>(µg/g) | P<br>(µg/g) | Zn<br>(µg/g) |
|------------------------------------|--------------------|-------------|-------------|-------------|-------------------------|-------------------|--------------|--------------|--------------|--------------|-------------|--------------|--------------|-------------|--------------|
| Sake<br><br>(Haplic ac-<br>risols) | Es_01              | 0.7         | 22.7        | 76.6        | 6.77                    | 16.34             | 123.23       | 3721.28      | 5.34         | 149.22       | 1221.05     | 386.68       | 22.20        | 14.31       | 2.73         |
|                                    | Es_02              | 3.4         | 89.3        | 7.3         | 6.56                    | 14.26             | 171.33       | 3893.07      | 6.40         | 161.05       | 1000.60     | 390.39       | 3.61         | 13.52       | 3.60         |
|                                    | Es_03              | 5.0         | 81.4        | 13.6        | 6.71                    | 13.84             | 592.29       | 159.34       | 1.05         | 233.04       | 79.47       | 51.53        | 6.80         | 15.76       | 0.19         |
|                                    | Es_04              | 4.6         | 85.0        | 10.3        | 6.82                    | 15.78             | 210.43       | 5076.15      | 8.86         | 196.24       | 1406.16     | 442.65       | 7.32         | 16.91       | 5.15         |
|                                    | Es_05              | 4.8         | 66.8        | 28.4        | 6.83                    | 20.65             | 163.52       | 4462.17      | 9.04         | 195.76       | 1344.34     | 502.10       | 27.32        | 18.11       | 3.78         |
|                                    | Es_06              | 3.5         | 71.5        | 24.9        | 6.57                    | 12.37             | 200.84       | 3743.62      | 7.00         | 188.58       | 1114.35     | 380.31       | 12.54        | 18.09       | 2.99         |
|                                    | Es_07              | 6.8         | 87.5        | 5.7         | 8.09                    | 10.99             | 153.17       | 6171.47      | 9.66         | 103.45       | 1105.54     | 338.26       | 6.32         | 9.58        | 3.62         |
|                                    | Es_08              | 5.4         | 85.3        | 9.3         | 6.69                    | 13.78             | 281.15       | 5245.84      | 10.40        | 204.52       | 1071.04     | 393.29       | 5.93         | 17.34       | 2.97         |
|                                    | Es_09              | 2.1         | 89.1        | 8.8         | 6.49                    | 4.04              | 188.71       | 2763.36      | 5.76         | 321.54       | 112.74      | 184.55       | 8.12         | 29.15       | 4.61         |
|                                    | Es_10              | 2.8         | 88.4        | 8.9         | 7.21                    | 3.46              | 230.18       | 1920.77      | 4.63         | 301.02       | 82.86       | 171.81       | 5.95         | 26.39       | 4.61         |
|                                    | Es_11              | 4.1         | 95.8        | 0.0         | 6.36                    | 3.01              | 292.85       | 1913.61      | 5.76         | 358.29       | 100.28      | 184.66       | 8.15         | 28.40       | 4.55         |
|                                    | Es_12              | 3.2         | 75.2        | 21.6        | 6.96                    | 13.52             | 202.04       | 6331.14      | 7.09         | 283.52       | 946.01      | 413.99       | 5.69         | 22.26       | 4.88         |
| Gr_01                              | 7.3                | 80.4        | 12.4        | 6.93        | 34.66                   | 68.15             | 7881.45      | 5.66         | 120.42       | 1542.84      | 731.90      | 12.70        | 10.80        | 4.15        |              |

|       |                                     |       |      |      |      |       |         |         |        |        |         |        |       |       |       |
|-------|-------------------------------------|-------|------|------|------|-------|---------|---------|--------|--------|---------|--------|-------|-------|-------|
|       | Gr_02                               | 7.7   | 74.7 | 17.7 | 6.86 | 39.49 | 71.84   | 7445.91 | 9.64   | 107.03 | 1569.07 | 505.05 | 9.33  | 10.17 | 2.94  |
|       | Gr_03                               | 4.2   | 86.2 | 9.6  | 6.64 | 9.98  | 180.15  | 3993.27 | 9.59   | 164.40 | 704.33  | 363.25 | 4.01  | 15.31 | 2.32  |
|       | Gr_04                               | 6.1   | 82.5 | 11.4 | 7.29 | 12.46 | 127.05  | 4729.45 | 6.79   | 122.96 | 961.76  | 351.76 | 9.72  | 14.68 | 4.70  |
|       | Gr_05                               | 3.6   | 89.9 | 6.6  | 6.49 | 14.62 | 209.83  | 3087.61 | 7.26   | 136.54 | 503.82  | 340.30 | 3.37  | 11.45 | 1.87  |
|       | Gr_06                               | 3.8   | 85.6 | 10.6 | 6.88 | 15.39 | 256.07  | 3265.42 | 10.46  | 206.47 | 535.54  | 374.25 | 3.92  | 15.58 | 2.33  |
|       | Gr_07                               | 1.6   | 38.2 | 60.2 | 6.33 | 16.57 | 248.54  | 3196.88 | 10.13  | 160.11 | 541.54  | 318.57 | 3.31  | 12.27 | 4.84  |
|       | Gr_08                               | 5.7   | 55.5 | 38.8 | 7.19 | 53.90 | 50.38   | 7846.99 | 8.37   | 117.08 | 1690.45 | 587.02 | 11.14 | 11.97 | 4.75  |
|       | Kirumba<br>(Aluandic an-<br>dosols) | Es_13 | 18.3 | 72.9 | 8.8  | 4.28  | 4.44    | 827.51  | 242.58 | 1.22   | 537.02  | 123.26 | 90.33 | 8.36  | 37.38 |
| Es_14 |                                     | 19.9  | 65.4 | 14.7 | 4.93 | 6.00  | 300.76  | 790.83  | 2.48   | 295.75 | 82.79   | 138.99 | 72.48 | 23.42 | 3.40  |
| Es_15 |                                     | 7.2   | 74.7 | 18.0 | 4.57 | 5.37  | 525.07  | 329.50  | 1.48   | 335.01 | 144.71  | 115.63 | 58.85 | 25.47 | 1.45  |
| Es_16 |                                     | 37.7  | 54.2 | 8.1  | 4.31 | 0.04  | 617.93  | 64.39   | 1.31   | 395.83 | 70.01   | 36.54  | 7.06  | 27.73 | 1.59  |
| Es_17 |                                     | 37.7  | 54.2 | 8.1  | 4.60 | 3.28  | 596.00  | 182.94  | 1.25   | 321.64 | 67.17   | 48.48  | 10.39 | 22.48 | 1.27  |
| Es_18 |                                     | 62.8  | 34.3 | 2.9  | 4.54 | 4.51  | 1541.87 | 24.07   | 1.44   | 330.08 | 35.02   | 7.69   | 1.23  | 23.36 | 0.26  |
| Es_19 |                                     | 18.2  | 63.5 | 18.3 | 4.94 | 1.10  | 709.30  | 153.23  | 2.27   | 186.69 | 128.23  | 61.63  | 10.39 | 12.79 | 0.42  |
| Es_20 |                                     | 59.7  | 31.6 | 8.7  | 4.66 | 4.77  | 68.89   | 7113.16 | 9.31   | 103.36 | 1517.84 | 483.98 | 8.84  | 9.97  | 2.81  |
| Gr_09 |                                     | 24.9  | 64.7 | 10.4 | 3.65 | 5.10  | 787.67  | 31.06   | 1.48   | 383.86 | 38.23   | 5.57   | 6.72  | 26.50 | 0.65  |
| Gr_10 |                                     | 34.9  | 53.3 | 11.9 | 5.22 | 6.98  | 309.35  | 918.04  | 2.81   | 254.15 | 197.33  | 175.03 | 0.00  | 22.77 | 4.45  |
| Gr_11 |                                     | 29.3  | 70.6 | 0.1  | 4.83 | 1.89  | 364.46  | 581.63  | 2.41   | 245.36 | 190.68  | 149.10 | 40.19 | 18.78 | 1.85  |
| GR_12 |                                     | 29.4  | 56.6 | 14.0 | 4.45 | 1.21  | 550.77  | 142.52  | 1.13   | 190.67 | 73.10   | 33.49  | 8.61  | 13.26 | 0.40  |

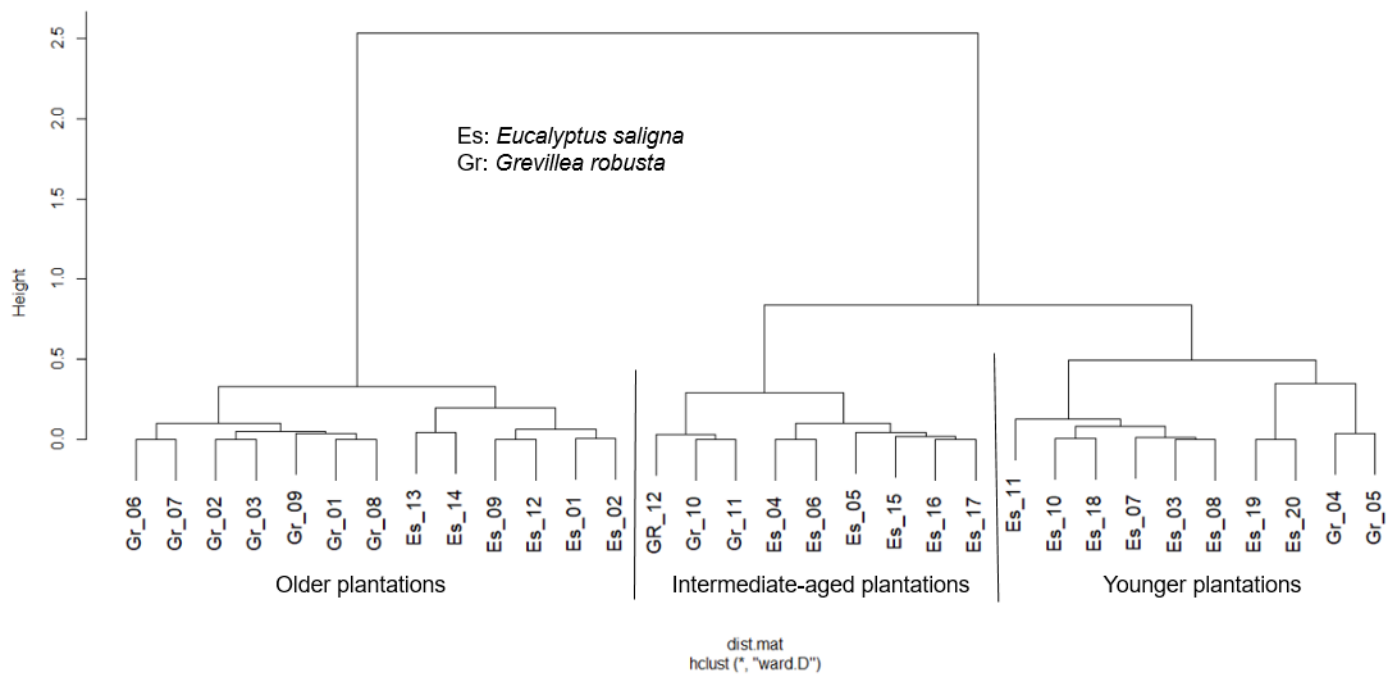

**Figure S1.** Hierarchical classification of plantations based on average age (in years) and species. The average age was estimated over three years and is equivalent, for each plantation, to the arithmetic mean of the ages calculated in 2018, 2019 and 2020. Es: *Eucalyptus saligna*; Gr: *Grevillea robusta*.

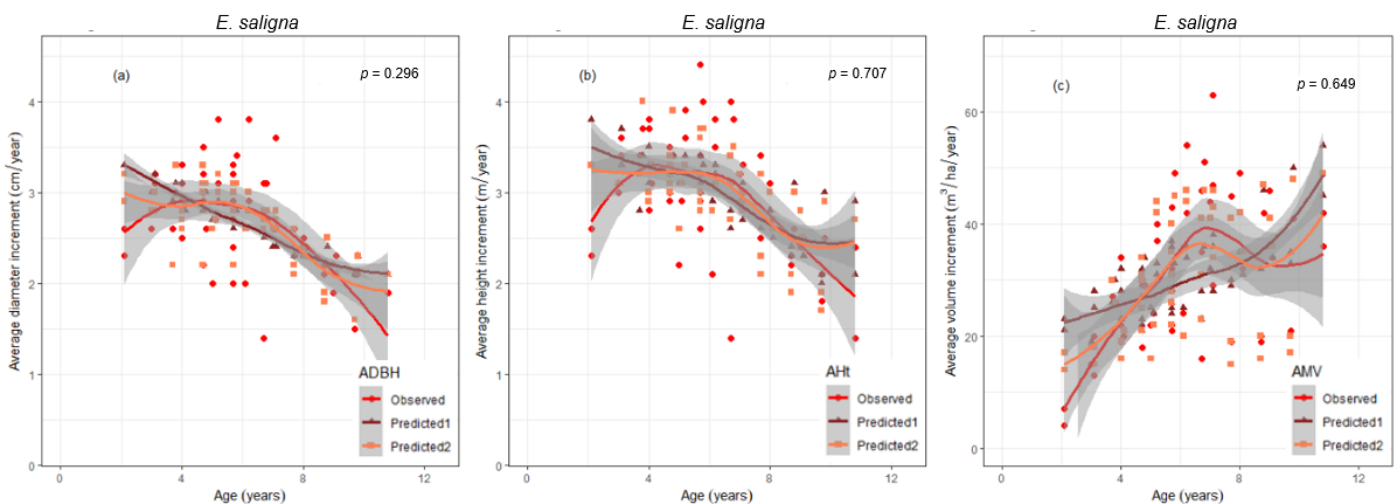

**Figure S2.** Projection of observed and predicted increases for *E. saligna*. Observed: observed values; Predicted1: predicted values from stand age and density; Predicted2: predicted values by combining biotic and abiotic factors with significant effects. The probability ( $p$ ) given is that of the Figner and Killen test.

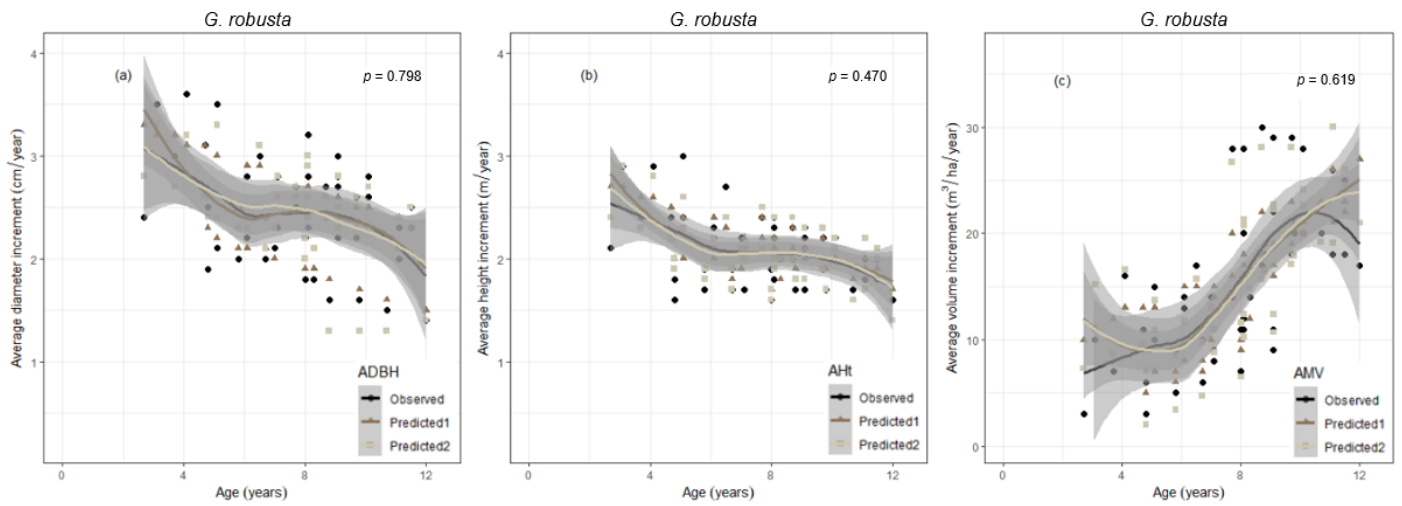

**Figure S3.** Projection of observed and predicted increments for *G. robusta*. Observed: observed values; Predicted1: predicted values from stand age and density; Predicted2: predicted values from combination of biotic and abiotic factors with significant effects. The probability ( $p$ ) given is that of the Fligner and Killeen test.
